# Supplementary material
Source: Springer Nature journal article supplement (https://www.springermedizin.de/resource/supplementary/12883_2009_303_MOESM1_ESM.pdf/9455104)

**a.**

**% all cause death**

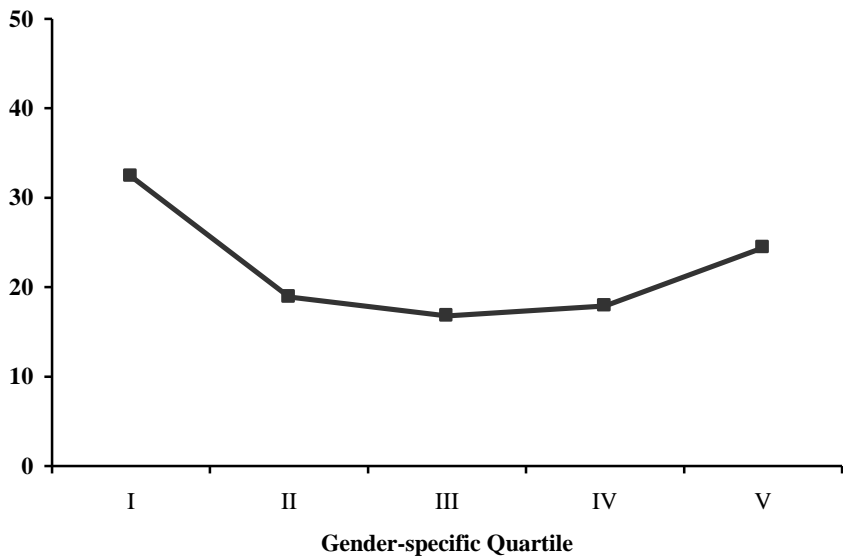

**b.**

**% disability, nursing  
facility or death**

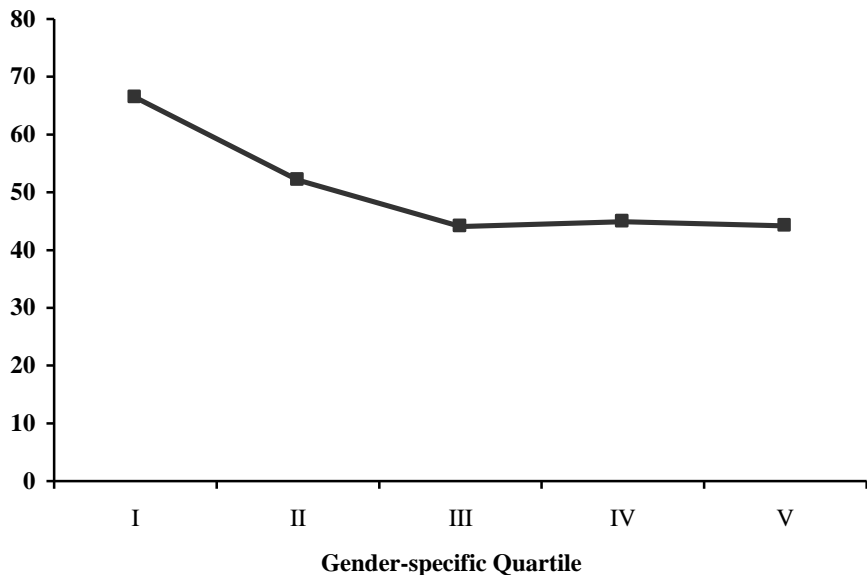

Supplement: MOESM1 [file 9455104]
